# Supplementary material
Source: publisher figshare collection journal article supplement (https://frontiersin.figshare.com/ndownloader/files/22194105)

**Fig 1a.** Average dose surface histograms with its standard deviation for “Total rectum” per treatment group, for the total treatment: physical dose ( $\alpha/\beta=\infty$ ). *Abbreviations:* HF=hypofractionation, SF=standard fractionation.

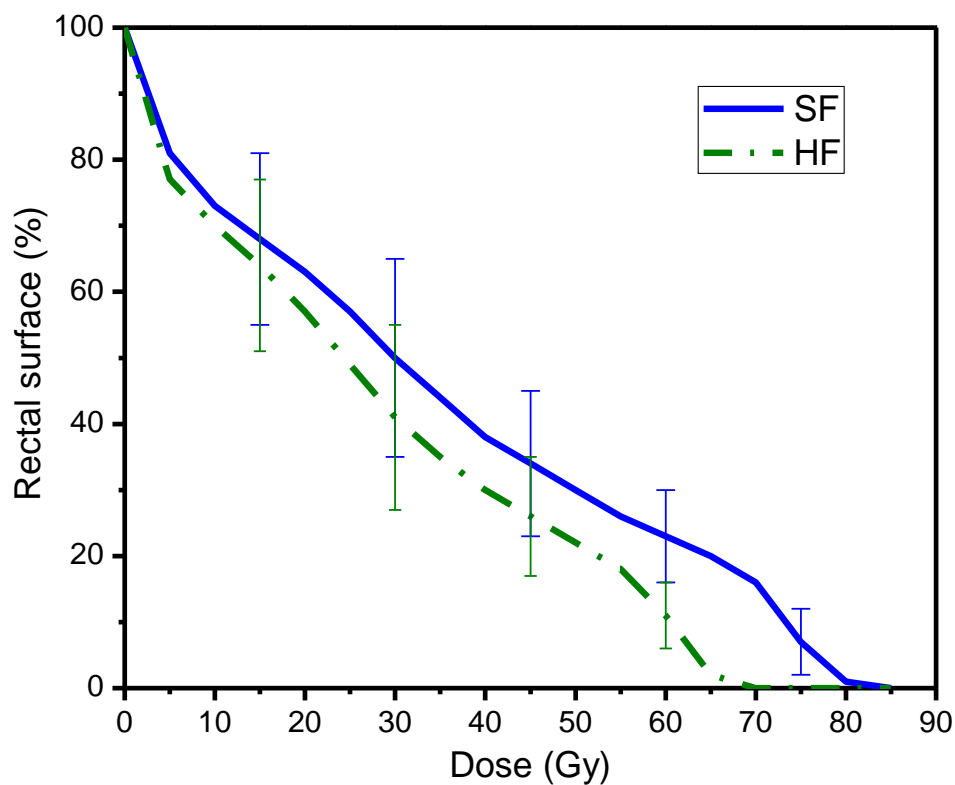

**Fig 1b.** Average dose surface histograms with its standard deviation for “Total rectum” per treatment group, for the total treatment with  $\alpha/\beta=3$ . *Abbreviations:* HF=hypofractionation, SF=standard fractionation.

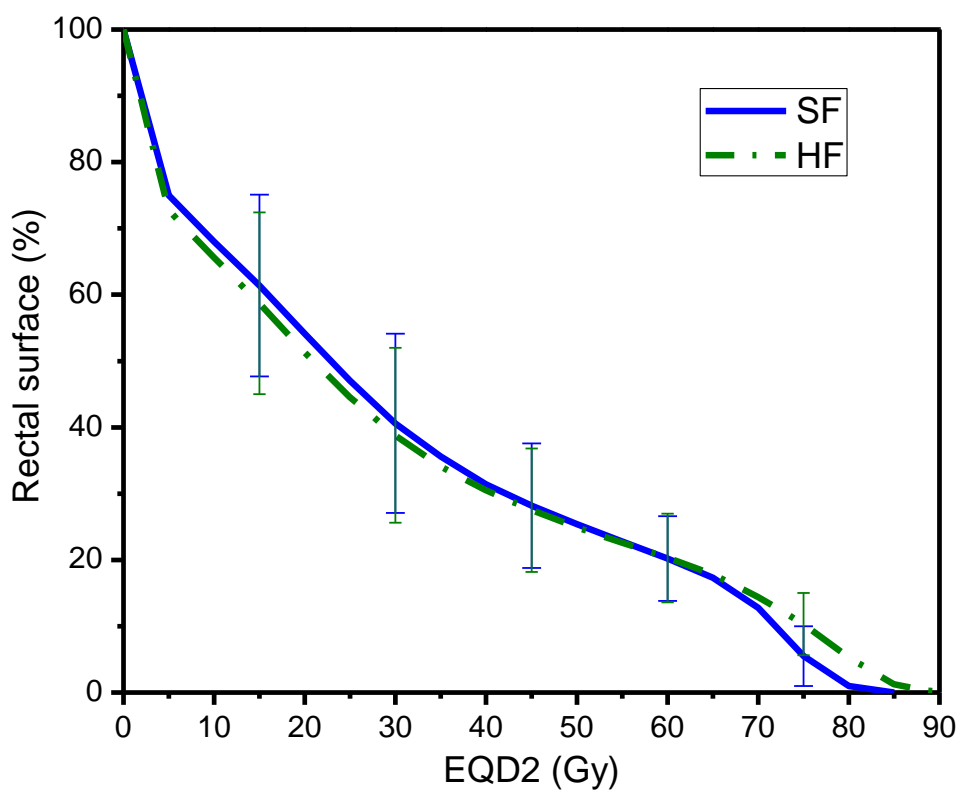

Supplement: Supplementary file [file 22194105]
